# Supplementary material for: Space–Time Clustering Characteristics of Malaria in Bhutan at the End Stages of Elimination
Source: MDPI journal article supplement (doi:10.3390/ijerph18115553), 2021-05-22
Supplement: s1 [file s1]

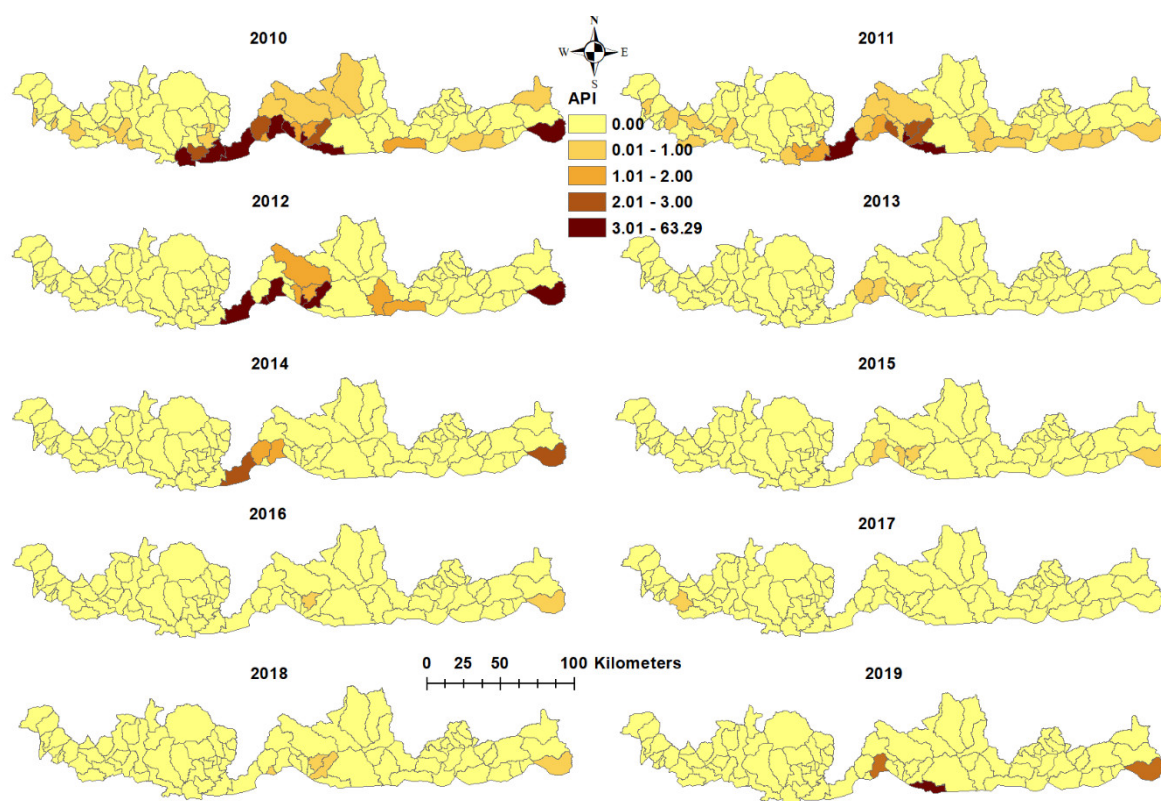

**Figure S1.** Annual parasite incidence of *Plasmodium falciparum*.

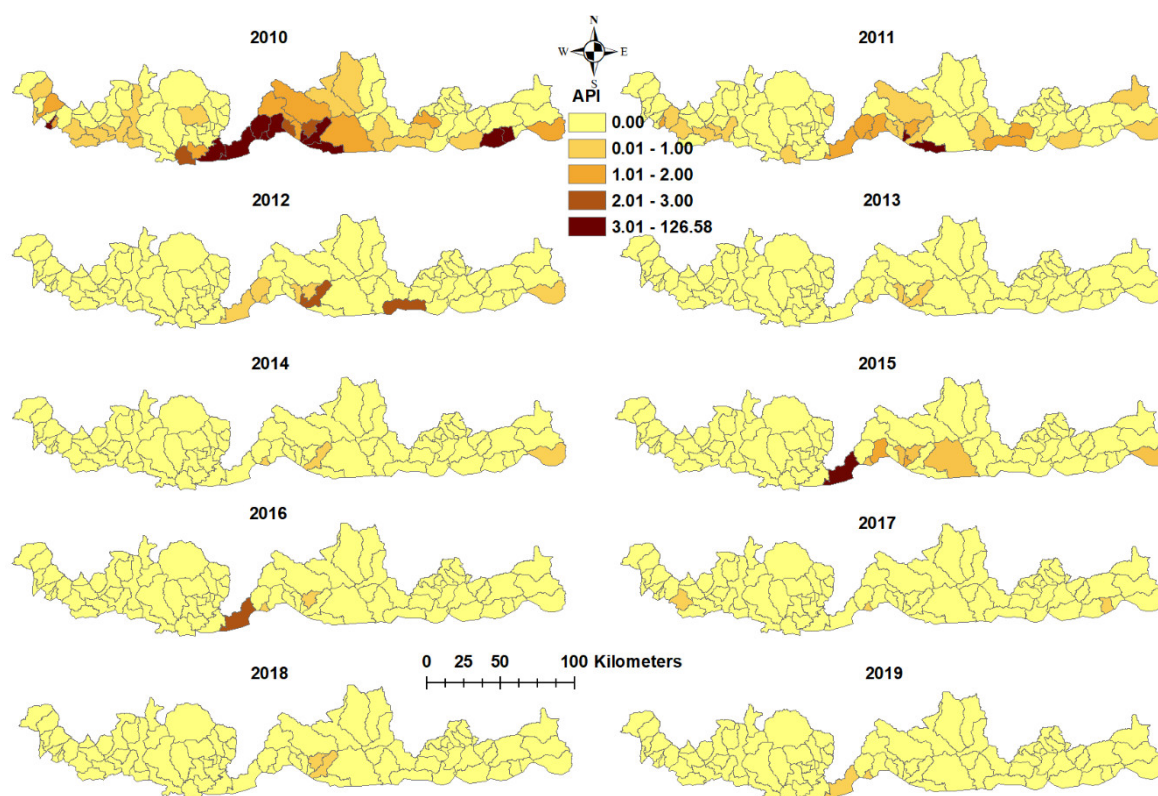

Figure S2. Annual parasite incidence of *Plasmodium vivax*.
